# Supplementary material
Source: publisher figshare collection journal article supplement (https://acs.figshare.com/ndownloader/files/4193527)

# Supporting Information

## High-Multiplicity Natural Orbitals in Multireference Configuration Interaction for Excited States

Zhen Lu and Spiridoula Matsika\*

Department of Chemistry, Temple University, Philadelphia, PA 19122

[smatsika@temple.edu](mailto:smatsika@temple.edu)

**General Remarks.** Here we give structures for all of the molecules studied in their equilibrium geometries.

ethylene

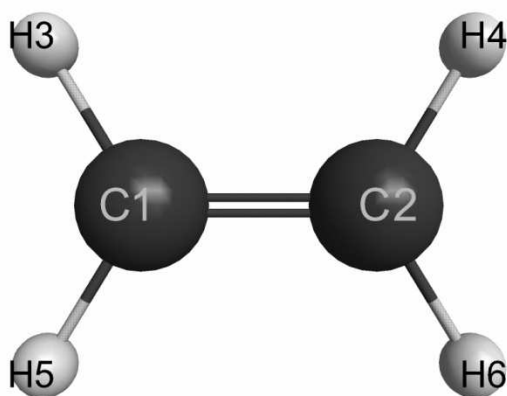

Formaldehyde

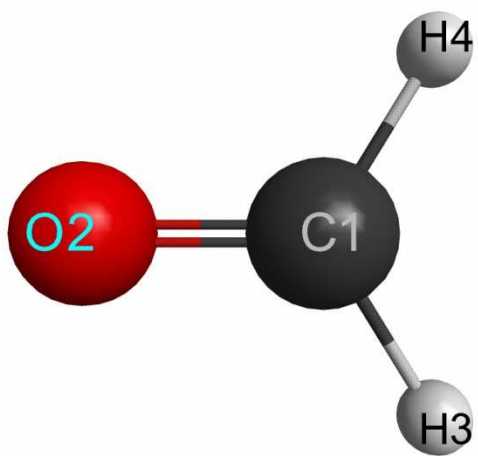

**Hexatriene**

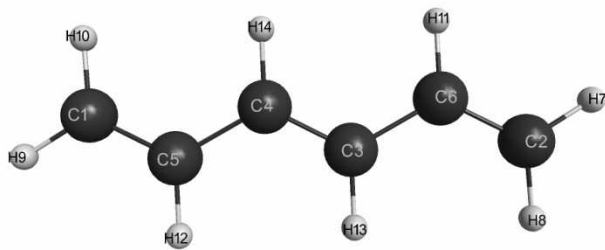

**Phenol**

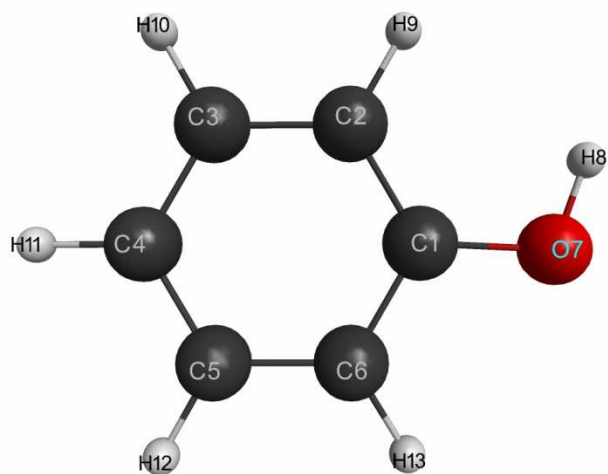

**Benzene**

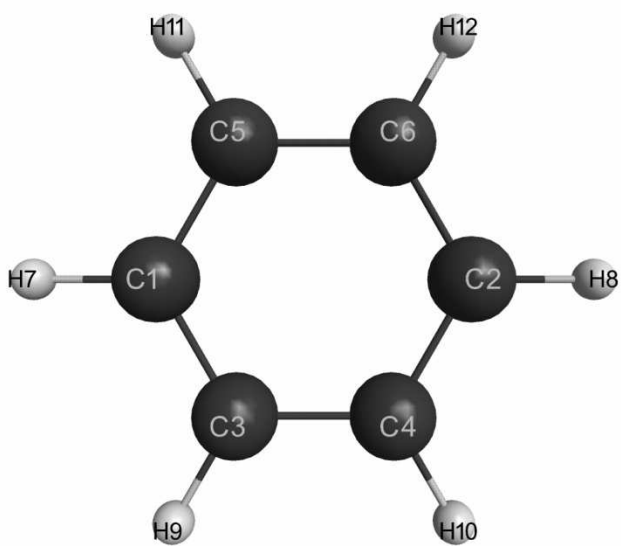

**Uracil**

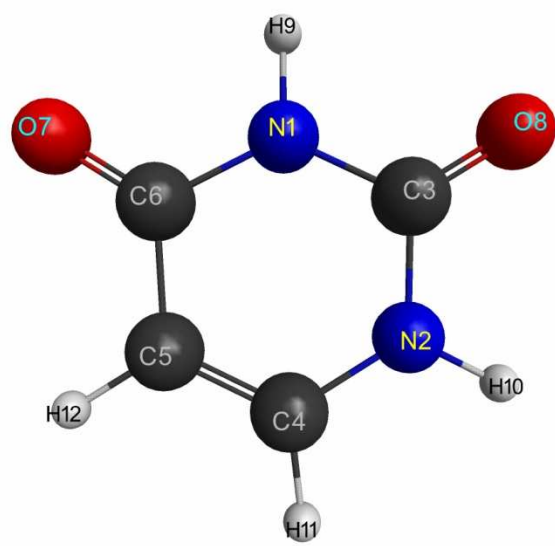

Supplement: Supplementary file 1 [file 4193527]
